# Supplementary material for: Gully rehabilitation in southern Ethiopia – value and impacts for farmers
Source: Copernicus journal article supplement (doi:10.5194/soil-10-637-2024), 2024-09-10
Supplement: Supplementary file 1 [file soil-10-637-2024-supplement.pdf]

Supplement of SOIL, 10, 637–654, 2024  
<https://doi.org/10.5194/soil-10-637-2024-supplement>  
© Author(s) 2024. CC BY 4.0 License.

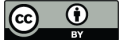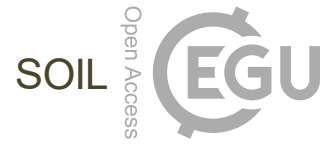

*Supplement of*

## **Gully rehabilitation in southern Ethiopia – value and impacts for farmers**

**Wolde Mekuria et al.**

*Correspondence to:* Wolde Mekuria (w.bori@cgiar.org)

The copyright of individual parts of the supplement might differ from the article licence.

## S1. Survey questions

### (a) Survey Questions used in Table 5

|                                                                                             |                                                                                                                                                                                                                       |
|---------------------------------------------------------------------------------------------|-----------------------------------------------------------------------------------------------------------------------------------------------------------------------------------------------------------------------|
| Do you think there is land degradation problem in your community?                           | 1: Yes 0: No                                                                                                                                                                                                          |
| If Yes: What is the most important form of land degradation?                                | 1: Soil erosion on farm land , 2: Soil erosion on communal grazing , 3: land Gully erosion, 4: Depletion of soil quality [SOM and nutrient depletion] , 5: Degradation of vegetation covers , 6: All, 7: Other, _____ |
| Compared to your past experience, how do you see gully formation now?                       | 1: increasing 2: decreasing 3: remain the same                                                                                                                                                                        |
| Where are gullies most frequently observed?                                                 | 1: farm land 2: grazing land 3: communal land<br>4: other _____                                                                                                                                                       |
| What are the measures taken to control further gully formation? (multiple answers possible) | 1 tree planting<br>2 water shade activities<br>3 terracing<br>4 other                                                                                                                                                 |
| Do you participate in watershed activities?                                                 | 1: YES 0: NO                                                                                                                                                                                                          |
| Do you think watershed activities use to control land degradation?                          | 1: Not useful, 2: Average, 3: useful, 4: Very useful, 5 Extremely useful                                                                                                                                              |

### (b) Survey Questions used in Table 6

|  | <b>Awareness/Recognition</b>                                                                                                                                                                                                                                                                                                                                                                                                                                                                                                                                                                                                 |
|--|------------------------------------------------------------------------------------------------------------------------------------------------------------------------------------------------------------------------------------------------------------------------------------------------------------------------------------------------------------------------------------------------------------------------------------------------------------------------------------------------------------------------------------------------------------------------------------------------------------------------------|
|  | <p>Name three interventions or activities which you know are important to reduce land degradation?</p> <p><b>Open-ended question</b> coded into following categories , 1 Physical SWC measures -in mountains area, e.g., hillside terrace, 2-Physical SWC measures - farmlands, e.g., bunds), 3 Gully rehabilitation measures (e.g., check-dams), 4-Afforestation/reforestation – tree planting, 5- Biological conservation measures – grass planting and related ones, 6-Water harvesting structures, e.g., micro-basins, small dams, etc.,7 Grazing land management, e.g., control grazing, cur and carry system, etc.</p> |
|  | <b>Knowledge/Recall</b>                                                                                                                                                                                                                                                                                                                                                                                                                                                                                                                                                                                                      |

|  |                                                                                                                                                                                                                                                                                                                                                                                                                                                                                                                                                                                                                                                                                                                                                                                                                                                                                                                                                                                                                     |
|--|---------------------------------------------------------------------------------------------------------------------------------------------------------------------------------------------------------------------------------------------------------------------------------------------------------------------------------------------------------------------------------------------------------------------------------------------------------------------------------------------------------------------------------------------------------------------------------------------------------------------------------------------------------------------------------------------------------------------------------------------------------------------------------------------------------------------------------------------------------------------------------------------------------------------------------------------------------------------------------------------------------------------|
|  | Please look at the following pictures which represent different gully treatments. Consider each treatment in turn and think about how effective you think it is likely to be against <b>reducing gully expansion, reducing runoff and soil loss</b>                                                                                                                                                                                                                                                                                                                                                                                                                                                                                                                                                                                                                                                                                                                                                                 |
|  | How effective do you think this <b>[Picture]</b> . Gully Treatment it is likely to be against <b>reducing gully expansion, reducing runoff and soil loss</b> ? Likert scale 1-5 – ineffective (0) to very effective (5)                                                                                                                                                                                                                                                                                                                                                                                                                                                                                                                                                                                                                                                                                                                                                                                             |
|  | <b>Capacity to Act</b>                                                                                                                                                                                                                                                                                                                                                                                                                                                                                                                                                                                                                                                                                                                                                                                                                                                                                                                                                                                              |
|  | If a gully started to appear on your land, and you wanted to apply this treatment <b>[Picture]</b> – Do you think                                                                                                                                                                                                                                                                                                                                                                                                                                                                                                                                                                                                                                                                                                                                                                                                                                                                                                   |
|  | <p>Likert scale 1-5</p> <ol style="list-style-type: none"> <li>1- You and your family could get the materials and have the capacity to do the work required on your own</li> <li>2- You would need help getting the materials, but you and your family could do the work required on your own</li> <li>3- You could get the materials but would also need help from neighbours and friends to do the work</li> <li>4- You would need help getting the materials and help from neighbours and friends to do the work</li> <li>5- You would require community mobilization and action to get the materials and do the work</li> </ol>                                                                                                                                                                                                                                                                                                                                                                                 |
|  | <p><b>Picture Code A.</b> Gully head treatment –using stone rip rap/rubble at gully head, <b>B.</b> Reshaping the gully banks at 45° and planting forage grasses, <b>C</b> Making check dams made of relatively small rocks are placed across the gully.<b>D</b> Making check dams constructed using vegetation or logs, <b>E</b> Making small barriers constructed of a series of gabion baskets bound together to form a flexible row in drainage ditches or storm water runoff channel.</p> <div style="display: flex; justify-content: space-around; align-items: center;">      </div> |
|  | <b>Attitudes</b>                                                                                                                                                                                                                                                                                                                                                                                                                                                                                                                                                                                                                                                                                                                                                                                                                                                                                                                                                                                                    |
|  | Consider the following statements . Answers on Likert Scale (1 Strongly Disagree to – 5 Strongly Agree)-                                                                                                                                                                                                                                                                                                                                                                                                                                                                                                                                                                                                                                                                                                                                                                                                                                                                                                            |
|  | I think that gully rehabilitation measures that individuals or small groups can implement without external support are possible and will be effective in addressing gully rehabilitation.                                                                                                                                                                                                                                                                                                                                                                                                                                                                                                                                                                                                                                                                                                                                                                                                                           |
|  | I think that as an individual or as a group with neighbours or friends, if a gully appeared on my land I could take action to prevent it from becoming worse                                                                                                                                                                                                                                                                                                                                                                                                                                                                                                                                                                                                                                                                                                                                                                                                                                                        |
|  | I think there are practices I can use in my day-to-day farming that could reduce gully formation                                                                                                                                                                                                                                                                                                                                                                                                                                                                                                                                                                                                                                                                                                                                                                                                                                                                                                                    |
|  | I think that we as a community can prevent gullies from becoming worse                                                                                                                                                                                                                                                                                                                                                                                                                                                                                                                                                                                                                                                                                                                                                                                                                                                                                                                                              |
|  | I think that we as a community can restore land that has had gully-formation                                                                                                                                                                                                                                                                                                                                                                                                                                                                                                                                                                                                                                                                                                                                                                                                                                                                                                                                        |

|  |                                                                                                                                                   |
|--|---------------------------------------------------------------------------------------------------------------------------------------------------|
|  | I think that in a small group with neighbors or friends, I can take action to which will be effective in in restoring degraded land..             |
|  | I think that we as a community can restore land that has had gully formation.                                                                     |
|  | <b>Behaviour</b>                                                                                                                                  |
|  | Consider the following statements Likert 1 ( <b>No, not at all</b> - 5 <b>-Yes, regularly</b> )                                                   |
|  | In the last 6 months, I have undertaken work on my own or with neighbours and friends to help restore and prevent gullies on the land which I use |
|  | In my farming, I actively try to decrease gully formation                                                                                         |
|  | In the last 6 months, I have undertaken work as part of the community to help restore and prevent gullies                                         |

## S2. Difference-in-difference approach and Multinomial logit

### (a) *Difference-in-difference approach*

The DD approach is one of the most popular non-experimental techniques in impact evaluation. . In a DD model, the relevant comparison is changes in the indicator over time. Thus, the comparison in a DD model is between the trends in the control group from before and after the project versus the trends in the treatment group. The double difference then refers to the difference over time (the first difference) and difference between the control and treatment (the second difference). If the trends are significantly greater for the treatment group (in a statistical sense), this suggests that the intervention had an impact. Thus, the DD estimator combines cross-sectional and over-time variation to correct for differences between groups when treated and controls start from different level. The DD approach can also be estimated using a regression approach provided there is baseline and post-treatment data for treatment and control groups. If there is, the following regression can be estimated:

$$Y_i = \beta_0 + \beta_1 D_i + \beta_2 T + \beta_3 (D_i T) + \varepsilon_i \quad (S1)$$

Where

$Y_i$  is the outcome variable indicator of interest for respondent  $i=1 \dots N$

$D_i$  is equal to one if the respondent lives in the treatment area and zero otherwise.

$T$  is equal to zero if at baseline and one after treatment;

$\varepsilon_i$  is the error term

With this estimation, the coefficient  $\beta_1$  controls for initial differences between control and treatment,  $\beta_2$  controls for general trends over time, and  $\beta_3$  provides the estimate of impact or the average treatment effect. The fundamental assumption of the DD estimator is that the control-group trend is identical to the trend that the treated group would have had in the absence of treatment. While this assumption is not testable, its validity should always be carefully discussed to ensure that the DD properly estimates the impact of the program.

### (b) *Latent Variables, Measurement Items and Cronbach Alpha*

Assume there exists some unobservable latent variable  $\xi$  which represent some concept of interest e.g. knowledge of gully treatments. We assume that the answers to the set of  $k$  questions (items) used in the survey will provide measurements  $x_k$  (via factor loadings  $\Lambda$ ) on this unobservable variable with error,  $\epsilon$ , i.e.

$$x_k = \Lambda \xi + \epsilon, \dots (S2)$$

The Cronbach alpha is used to test reliability of whether the set of measurements (items)  $x_k$  are capturing the same underlying latent variable. The Cronbach alpha statistic is defined as

$$\alpha = \frac{k\bar{\sigma}_{ij}^2}{\bar{\sigma}_i^2 + (k-1)\bar{\sigma}_{ij}^2} \dots (S3)$$

Where  $\bar{\sigma}_i^2$  – average variance of each measurement item k ,  $\bar{\sigma}_{ij}^2$  is the average covariance between the measurement items. The coefficient alpha ranges from 0 to 1, and coefficient alpha of 0.7 or greater is considered to be an acceptable measure of reliability (Taber, 2018).

**(c) Multinomial logit**

Multinomial logistic regression (MNL) is widely used to model discrete data where there are multiple choices and that these have no natural order (Greene 2012). In this application, the survey answers reflect the individuals perceived capacity to deal with different gully treatments, were aggregated into three categories namely, could do it on own (1) , need neighbors (2) and need community mobilization (3). The MNL models the probability of each choice as a function of whether the respondent is in a treatment area or not ( $D_i = 1.0$ ), relative to the base category, where the base category here equals 3 (need community).

$$\pi_{i1} = Pr(Y_i = 1) = \frac{e^{\beta_1 D_i}}{1 + e^{\beta_1 D_i} + e^{\beta_2 D_i}} \dots (S4)$$

$$\pi_{i2} = Pr(Y_i = 2) = \frac{e^{\beta_2 D_i}}{1 + e^{\beta_1 D_i} + e^{\beta_2 D_i}} \dots (S5)$$

$$\pi_{i3} = Pr(Y_i = 3) = \frac{1}{1 + e^{\beta_1 D_i} + e^{\beta_2 D_i}} \dots (S6)$$

With for example, the relative probability of a respondent answering that they would be able to undertake the gully treatment ( $y = 1$ ) relative to the base outcome (community support needed) is

$$\frac{Pr(Y_i=1)}{Pr(Y_i=3)} = e^{\beta_1 D_i} \dots (S7)$$

While the discrete marginal effect defined e.g. for  $Pr(Y_i = 1)$ , as

$$\sum_i (Pr(Y_i = 1|D_i = 1) - Pr(Y_i = 1|D_i = 0)) \dots (S8)$$

**Table S1. Benefits of gully rehabilitation measures in the perspective of local communities**

| Factors                                            | Women Group |     |     |     |    |               | Men Group |     |     |     |    |               |
|----------------------------------------------------|-------------|-----|-----|-----|----|---------------|-----------|-----|-----|-----|----|---------------|
|                                                    | GHT         | GRP | LRC | VLC | GC | F-Category    | GHT       | GRP | LRC | VLC | GC | F-Category    |
| Enables additional income                          |             |     |     |     |    | Economic      | ✓         | ✓   | ✓   | ✓   | ✓  | Economic      |
| Uses locally available materials                   | ✓           | ✓   |     | ✓   |    | Economic      |           |     |     |     |    | Economic      |
| Facilitates movement of people and livestock       |             | ✓   | ✓   | ✓   | ✓  | Social        | ✓         | ✓   | ✓   | ✓   | ✓  | Social        |
| Creates opportunities for fattening                |             | ✓   |     |     | ✓  | Economic      |           | ✓   |     |     |    | Economic      |
| Increases access to food and food diversity in HHs |             |     |     |     |    | Social        | ✓         | ✓   | ✓   | ✓   |    | Social        |
| Conserves water/increase access                    |             |     | ✓   |     | ✓  | Environmental |           |     |     |     |    | Environmental |
| Improves the scene of the environment              |             |     |     |     |    | Environmental |           | ✓   |     |     |    | Environmental |
| Improves agricultural production                   | ✓           | ✓   |     | ✓   | ✓  | Economic      | ✓         |     |     |     |    | Economic      |
| Increases land productivity                        | ✓           | ✓   | ✓   | ✓   | ✓  | Economic      | ✓         | ✓   |     |     | ✓  | Economic      |
| Increases access to productive land                |             |     | ✓   |     |    | Economic      |           |     |     |     |    | Economic      |
| Improves soil fertility                            | ✓           | ✓   |     | ✓   | ✓  | Environmental |           |     |     | ✓   |    | Environmental |
| Increases availability of livestock feed           | ✓           | ✓   | ✓   |     | ✓  | Economic      | ✓         | ✓   | ✓   | ✓   | ✓  | Economic      |
| Rehabilitates degraded lands                       |             |     |     |     |    | Environmental |           |     | ✓   |     |    | Environmental |
| Increases livestock products                       |             | ✓   |     |     |    | Economic      |           | ✓   |     |     |    | Economic      |
| Improves soil moisture content                     |             | ✓   |     |     | ✓  | Environmental | ✓         | ✓   | ✓   | ✓   | ✓  | Environmental |
| Reduces damage caused by flood                     |             |     |     |     |    | Social        | ✓         | ✓   | ✓   |     | ✓  | Social        |
| Regulates micro-climate                            |             |     |     |     |    | Environmental |           |     |     |     | ✓  | Environmental |
| Easy to construct and takes less labor             |             |     |     |     |    | Economic      | ✓         |     |     | ✓   |    | Economic      |
| Lasts for longer time                              |             |     |     |     |    | Economic      |           |     | ✓   |     |    | Economic      |
| Serves as a learning site                          |             |     |     |     |    | Social        |           | ✓   | ✓   | ✓   |    | Social        |
| Prevents farmland loss                             | ✓           | ✓   | ✓   | ✓   | ✓  | Economic      |           |     |     |     |    | Economic      |
| Reduces soil erosion                               | ✓           | ✓   | ✓   |     | ✓  | Environmental | ✓         | ✓   | ✓   | ✓   | ✓  | Environmental |
| Reduced run off                                    | ✓           | ✓   | ✓   | ✓   | ✓  | Environmental |           |     |     |     |    | Environmental |

*Note: GHT refers to gully head treatment, GRP – gully reshaping and planting, LRC – loose rock check-dam, VLC – Vegetation log check-dam, GC – gabion check-dam and F-category – factor category.*

**Table S2. Costs of gully rehabilitation measures in the perspective of local communities**

| Factors                                                  | Women Group |     |     |     |    |               | Men Group |     |     |     |    |               |
|----------------------------------------------------------|-------------|-----|-----|-----|----|---------------|-----------|-----|-----|-----|----|---------------|
|                                                          | GHT         | GRP | LRC | VLC | GC | F-Category    | GHT       | GRP | LRC | VLC | GC | F-Category    |
| Takes more productive lands                              | ✓           |     |     |     |    | Economic      |           | ✓   |     |     |    | Economic      |
| Construction takes time                                  |             |     | ✓   |     | ✓  | Social        |           |     |     |     |    | Social        |
| Requires energy and labor                                | ✓           | ✓   | ✓   | ✓   | ✓  | Economic      | ✓         | ✓   | ✓   |     | ✓  | Economic      |
| Needs to be done in large scale                          |             |     |     |     |    | Economic      | ✓         | ✓   |     | ✓   |    | Economic      |
| Causes accidents to people and livestock                 |             | ✓   | ✓   | ✓   | ✓  | Social        |           |     | ✓   |     | ✓  | Social        |
| Requires collaboration among farmers                     |             |     |     |     |    | Social        |           |     |     |     | ✓  | Social        |
| Does not last long                                       | ✓           |     | ✓   | ✓   |    | Economic      |           |     |     | ✓   |    | Economic      |
| Costly                                                   | ✓           | ✓   | ✓   |     | ✓  | Economic      |           |     |     |     | ✓  | Economic      |
| Less effective in reducing runoff/erosion                |             |     |     | ✓   |    | Environmental |           |     |     | ✓   |    | Environmental |
| Could cause conflict among farmers                       |             | ✓   |     |     | ✓  | Social        |           |     |     |     |    | Social        |
| Lack of locally available materials                      | ✓           | ✓   | ✓   | ✓   | ✓  | Economic      | ✓         | ✓   | ✓   | ✓   | ✓  | Economic      |
| Requires integration with biological measures            |             |     |     |     |    | Environmental |           |     | ✓   |     | ✓  | Environmental |
| Requires skilled labor & technical support               |             |     | ✓   |     | ✓  | Social        |           | ✓   | ✓   |     | ✓  | Social        |
| Requires maintenance and protection from theft of stones |             |     |     |     |    | Economic      |           |     | ✓   |     |    | Economic      |
| Requires farm implements                                 | ✓           | ✓   | ✓   |     | ✓  | Economic      |           | ✓   | ✓   |     | ✓  | Economic      |
| Shortage of seedlings                                    |             |     |     |     |    | Economic      |           | ✓   |     |     |    | Economic      |
| The wood and materials like nails are exposed to theft   |             |     |     | ✓   |    | Social        |           |     |     |     |    | Social        |
